# Supplementary material
Source: PubMed Central journal article supplement (PMC5814352)
Supplement: NIHMS930180-supplement-1.pdf [file NIHMS930180-supplement-1.pdf]

**Supplementary Figure**

**Structural basis for DNMT3A-mediated *de novo* DNA methylation**

Zhi-Min Zhang, Rui Lu, Pengcheng Wang, Yang Yu, Dong-Liang Chen, Linfeng Gao, Shuo Liu, Debin Ji, Scott B Rothbart, Yinsheng Wang, Gang Greg Wang, Jikui Song

**Supplementary Figure 1.**

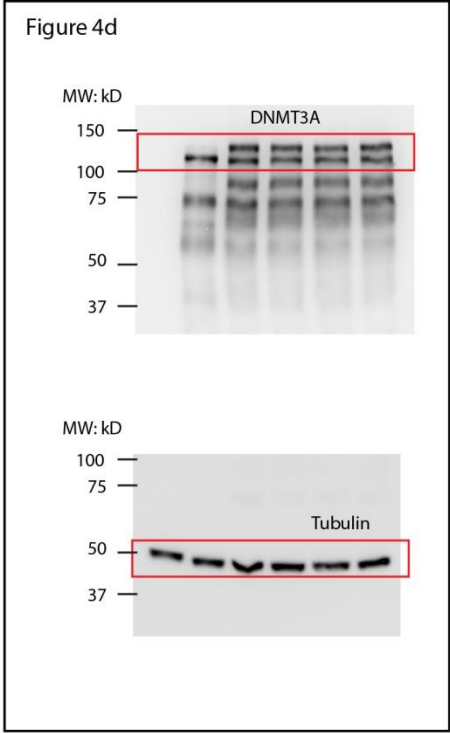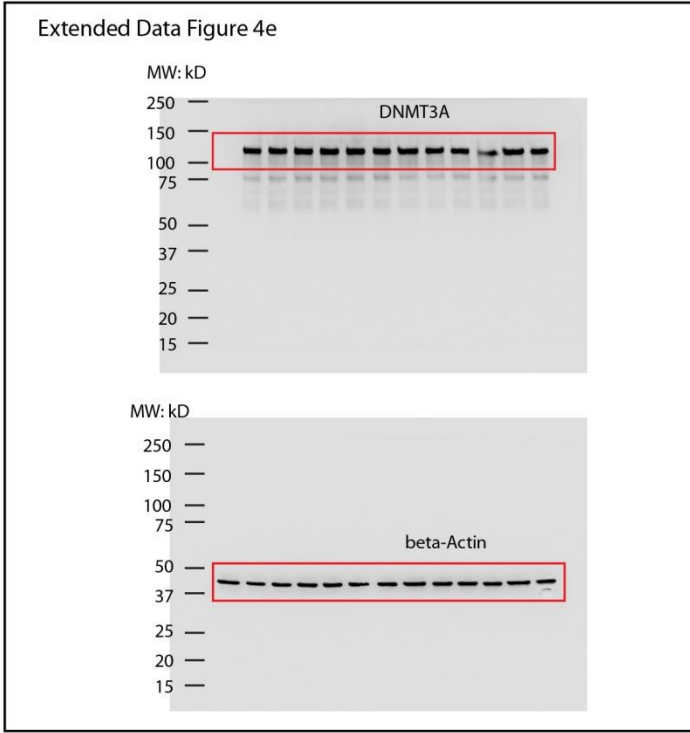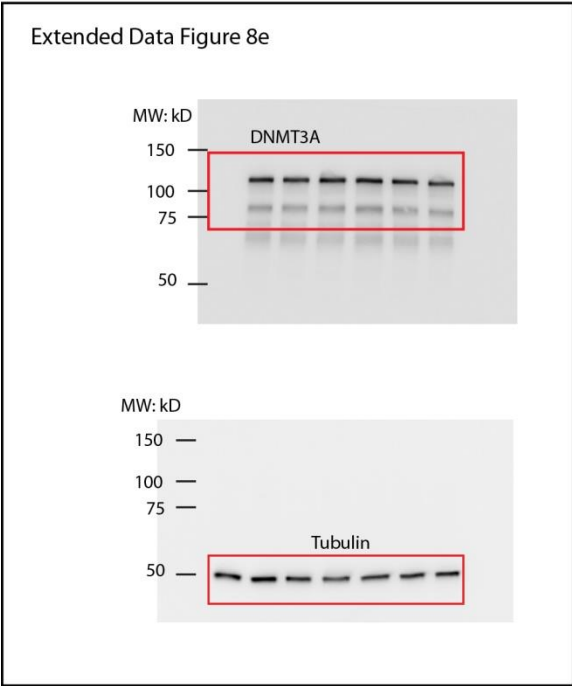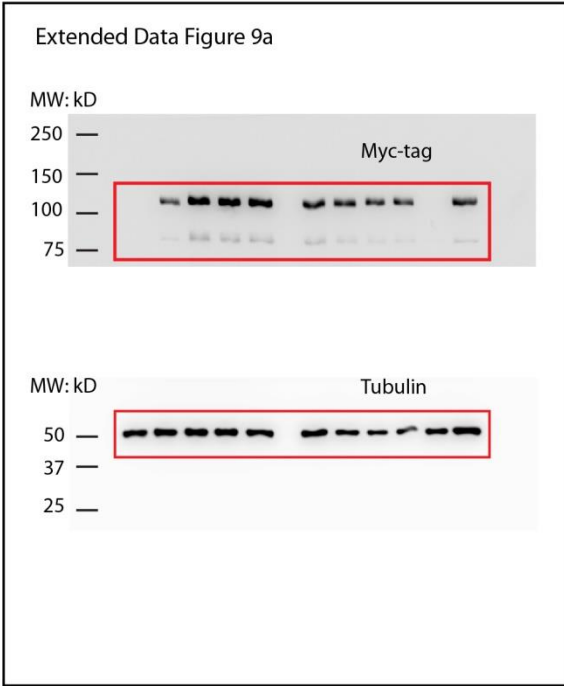

**Supplementary Figure 1. Uncropped images for western blots in the main figures and supplementary figures.** This file contains full uncropped scans of Western blots showing molecular-weight markers presented in Figure 4d and Extended Data Figures 4e, 8e and 9a. Shown are representative blots of two independent experiments with similar results.
